# Supplementary material for: The Chd1 chromatin remodeler shifts hexasomes unidirectionally
Source: eLife journal article supplement (doi:10.7554/elife.21356), 2016-12-29
Supplement: supp [file elife_poa_e21356_Figure_3_Supplement_1.pdf › elife_poa_e21356_Figure_3_Supplement_1.pdf]

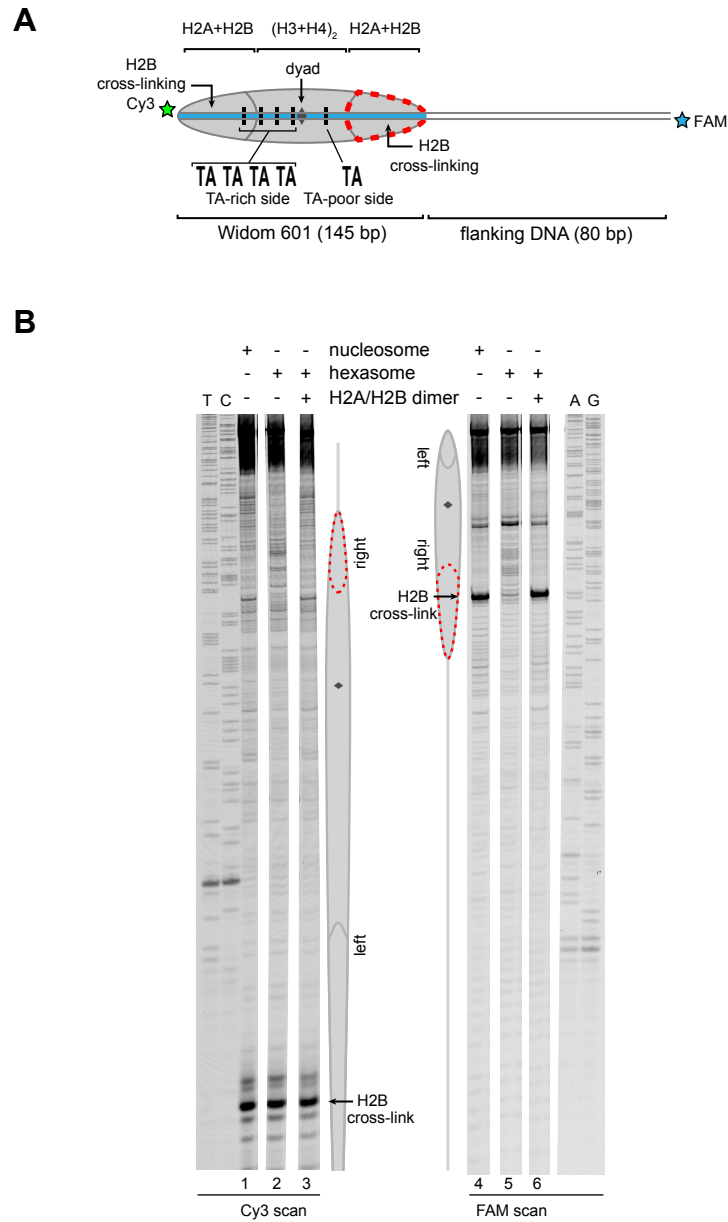

**Figure 3 - Supplement 1.**

**Addition of H2A/H2B dimer to hexasomes produces canonical nucleosomes, regardless of flanking DNA location.**

**(A)** Schematic representation of the 0-601-80 nucleosome and hexasome, highlighting the location where the hexasome lacks one H2A/H2B dimer.

**(B)** Histone mapping experiments using 0-601-80 nucleosomes, hexasomes, and hexasomes plus excess H2A/H2B dimer. Reactions were carried out as described for Figure 3. Sequencing ladder markers (T, C, A, G) were run in the same gel as the samples. Representative of three or more experiments.
