# Supplementary material for: The Chd1 chromatin remodeler shifts hexasomes unidirectionally
Source: eLife journal article supplement (doi:10.7554/elife.21356), 2016-12-29
Supplement: supp [file elife_poa_e21356_Figure_4_Supplement_1.pdf › elife_poa_e21356_Figure_4_Supplement_1.pdf]

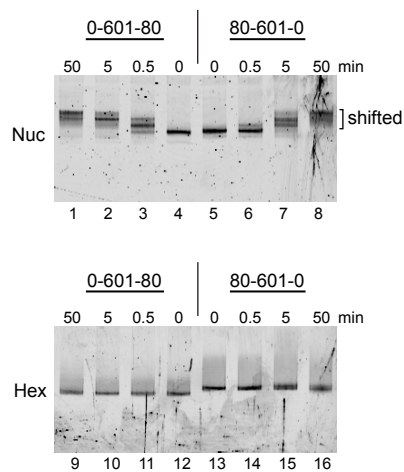

**Figure 4 - Figure Supplement 1.**

**Chd1 remodeling dramatically alters nucleosome but not hexasome mobility as assessed by native PAGE.**

Purified nucleosomes (top) or hexasomes (bottom), each 150 nM, were incubated with yeast Chd1 (50 nM) and 2.5 mM ATP in sliding buffer for 0, 0.5, 5, and 50 min. After quenching with EDTA and stop DNA, reaction products were separated by native PAGE. Shown is a representative of four independent experiments.
