# Supplementary material for: The Chd1 chromatin remodeler shifts hexasomes unidirectionally
Source: eLife journal article supplement (doi:10.7554/elife.21356), 2016-12-29
Supplement: supp [file elife_poa_e21356_Figure_6_Supplement_1.pdf › elife_poa_e21356_Figure_6_Supplement_1.pdf]

**A**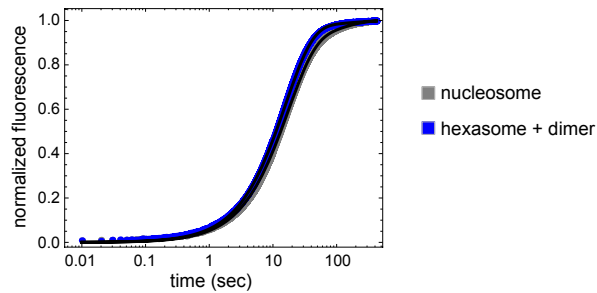**B**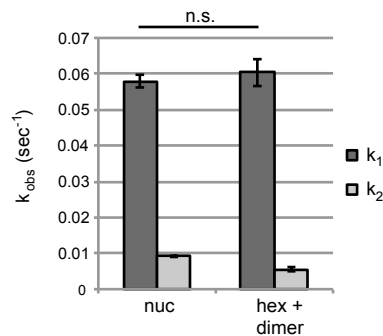**Figure 6 - Figure Supplement 1.****Chd1 repositions nucleosome and hexasome plus dimer at similar rates with limiting ATP**

(A) Progress curves from stopped flow experiments performed with 400 nM Chd1 on 10 nM 0-601-80 nucleosomes (gray) or 10 nM hexasomes plus 12 nM dimer (blue) in the presence of 25  $\mu\text{M}$  ATP. Reactions were followed by Cy3B-Dabcyl SQOF. Black lines depict double exponential fits of the data. Each progress curve is the average of 3-6 technical replicates and is representative of three independent experiments.

(B) Comparison of sliding rates. The bar chart shows observed fast and slow rates ( $k_1$ ,  $k_2$ ) from the fits as means  $\pm$  standard deviations from three independent experiments. n.s. = not significant.
