# Supplementary material for: The Chd1 chromatin remodeler shifts hexasomes unidirectionally
Source: eLife journal article supplement (doi:10.7554/elife.21356), 2016-12-29
Supplement: supp [file elife_poa_e21356_Figure_7_Supplement_2.pdf › elife_poa_e21356_Figure_7_Supplement_2.pdf]

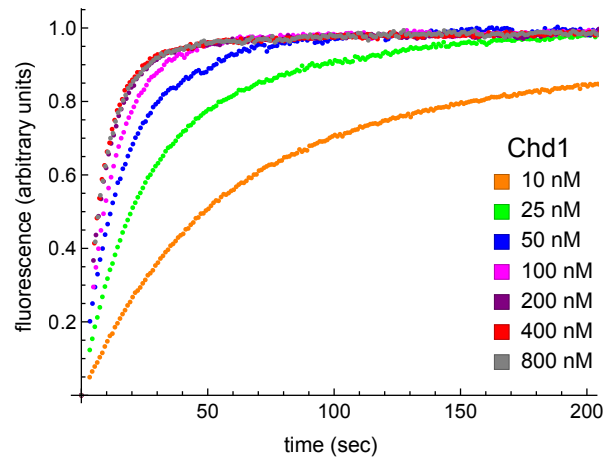

### Figure 7 - Supplement 2. Remodeling saturates at 400 nM Chd1

Nucleosomes formed by adding 12 nM dimer to 10 nM 0-601-80 hexasomes were titrated with 10, 25, 50, 100, 200, 400, and 800 nM Chd1 and 25  $\mu$ M ATP. Reactions were monitored by Cy3-Cy3 SQOF via fluorometer, and show that remodeling plateaued at 400 nM Chd1. The progress curves shown are representative of two independent Chd1 titrations using unmodified H2B (Wt-Wt). Similar results were observed for duplicate titrations using Ub-Wt, Wt-Ub, and Ub-Ub nucleosomes.
